# Supplementary material
Source: PubMed Central journal article supplement (PMC4097107)
Supplement: NIHMS611735-supplement-Supplement__Figure_1.pdf [file NIHMS611735-supplement-Supplement__Figure_1.pdf]

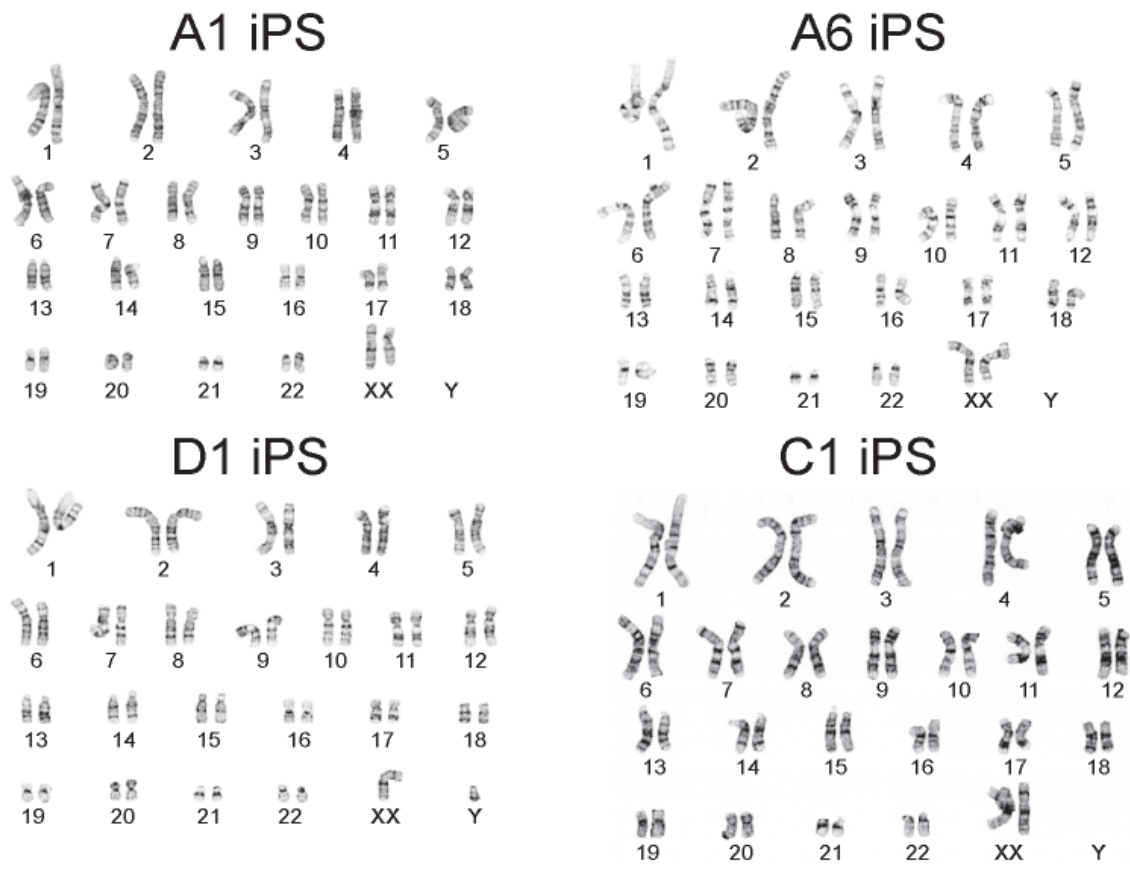

**Supplemental Figure 1:**  
 Chromosomal analysis of iPS cell lines A1, A6, C1, and D1 reveal a normal karyotype
