# Supplementary material
Source: PubMed Central journal article supplement (PMC4097107)
Supplement: NIHMS611735-supplement-Supplement__Figure_2.pdf [file NIHMS611735-supplement-Supplement__Figure_2.pdf]

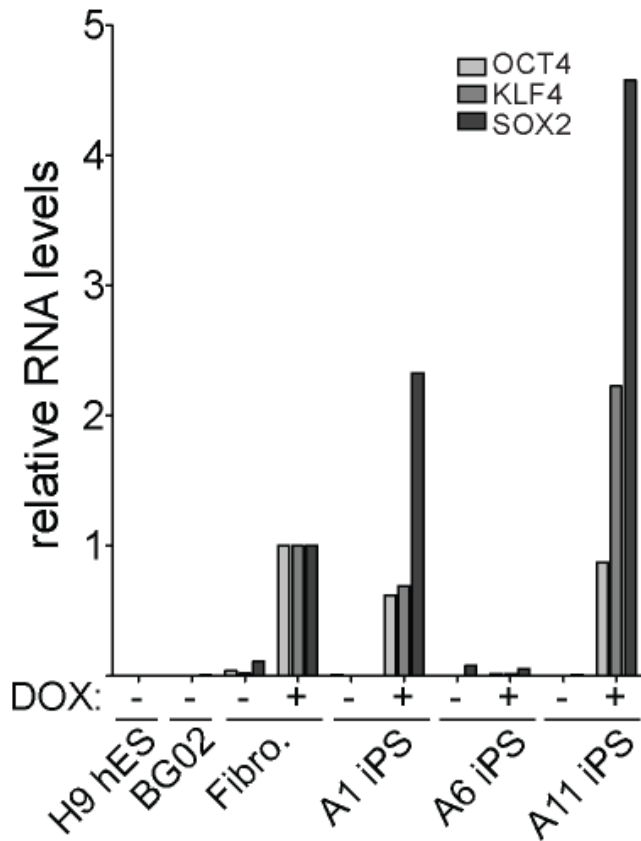

**Supplemental Figure 2:**

**Expression of reprogramming factors is dependent on doxycycline in iPS cells**

Quantitative RT-PCR for DOX-dependent transgene expression of OCT4, KLF4 and SOX2 in iPS cells compared to hES cells and primary infected fibroblasts. Relative expression levels were normalized to DOX-induced expression in primary infected fibroblasts in the presence of DOX.
