# Supplementary material
Source: PubMed Central journal article supplement (PMC4097107)
Supplement: NIHMS611735-supplement-Supplement__Figure_3.pdf [file NIHMS611735-supplement-Supplement__Figure_3.pdf]

## Nanog promoter

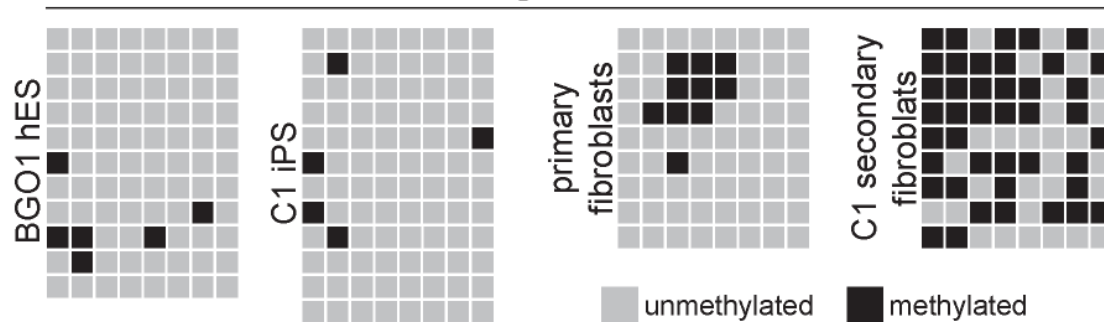

### Supplemental Figure 3:

#### Methylation analysis of the NANOG promoter region

Light graysquares indicate unmethylated and black squares indicate methylated CpGs, in the NANOG promoter of iPS cells, hES cells, primary, and secondary fibroblast

### A2 secondary fibroblasts DOX withdrawn on day 14

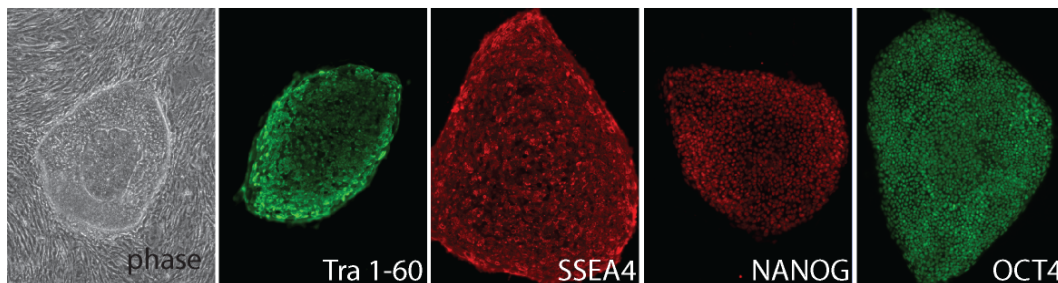

### Supplemental Figure 4:

#### Transgene expression for 14 days is sufficient to isolate A2 secondary iPS cells

Immunostaining for SSEA4, Tra 1-60, OCT4 and NANOG of secondary A2 iPS cells, which were derived by DOX-induction for 14 days.
