# Supplementary material
Source: PubMed Central journal article supplement (PMC4097107)
Supplement: NIHMS611735-supplement-Supplement__Table_1.pdf [file NIHMS611735-supplement-Supplement__Table_1.pdf]

## SUPPLEMENTAL MATERIAL

| viral delivery                           | parental cells              | #of individual clones based on southern analysis | Immuno staining OCT4, SOX2, NANOG, Tra 1-60 and SSEA4 | endogenous gene expression OCT4, SOX2, and NANOG | karyotype            | teratoma formation |
|------------------------------------------|-----------------------------|--------------------------------------------------|-------------------------------------------------------|--------------------------------------------------|----------------------|--------------------|
| constitutive active lentivirues          | adult fibroblasts GM01660   | 2                                                | positive                                              | reactivated                                      | 1/2 tested abnormal* | pluripotent        |
| Dox inducible 3 factor cells mouse cDNAs | adult fibroblasts GM01660   | 2                                                | positive                                              | reactivated                                      | 2/2 tested normal    | pluripotent        |
| Dox inducible 4 factor cells human cDNAs | embryonic fibroblasts MRC-5 | 2                                                | positive                                              | reactivated                                      | 1/1 tested normal    | pluripotent        |
| Dox inducible 3 factor cells human cDNAs | adult fibroblasts GM01660   | 6                                                | positive                                              | reactivated                                      | 3/3 tested normal    | pluripotent        |

\* one out of two cell lines presented an abnormal Karyotype (44,XX,-3,-13,der(17)del(17)(p11.2)t(7:17)(p11.2;p25)[21]

### Supplemental Table 1: Summary of human iPS cells derived during this study
